# Supplementary material for: Dysregulation of mitochondrial dynamics proteins are a targetable feature of human tumors
Source: PubMed Central journal article supplement (PMC5919970; doi:10.1038/s41467-018-04033-x), 2018-04-26
Supplement: 41467_2018_4033_MOESM1_ESM.pdf [file 41467_2018_4033_MOESM1_ESM.pdf]

## **Dysregulation of mitochondrial dynamics proteins are a targetable feature of human tumors**

Anderson et al.

**Supplementary Information**

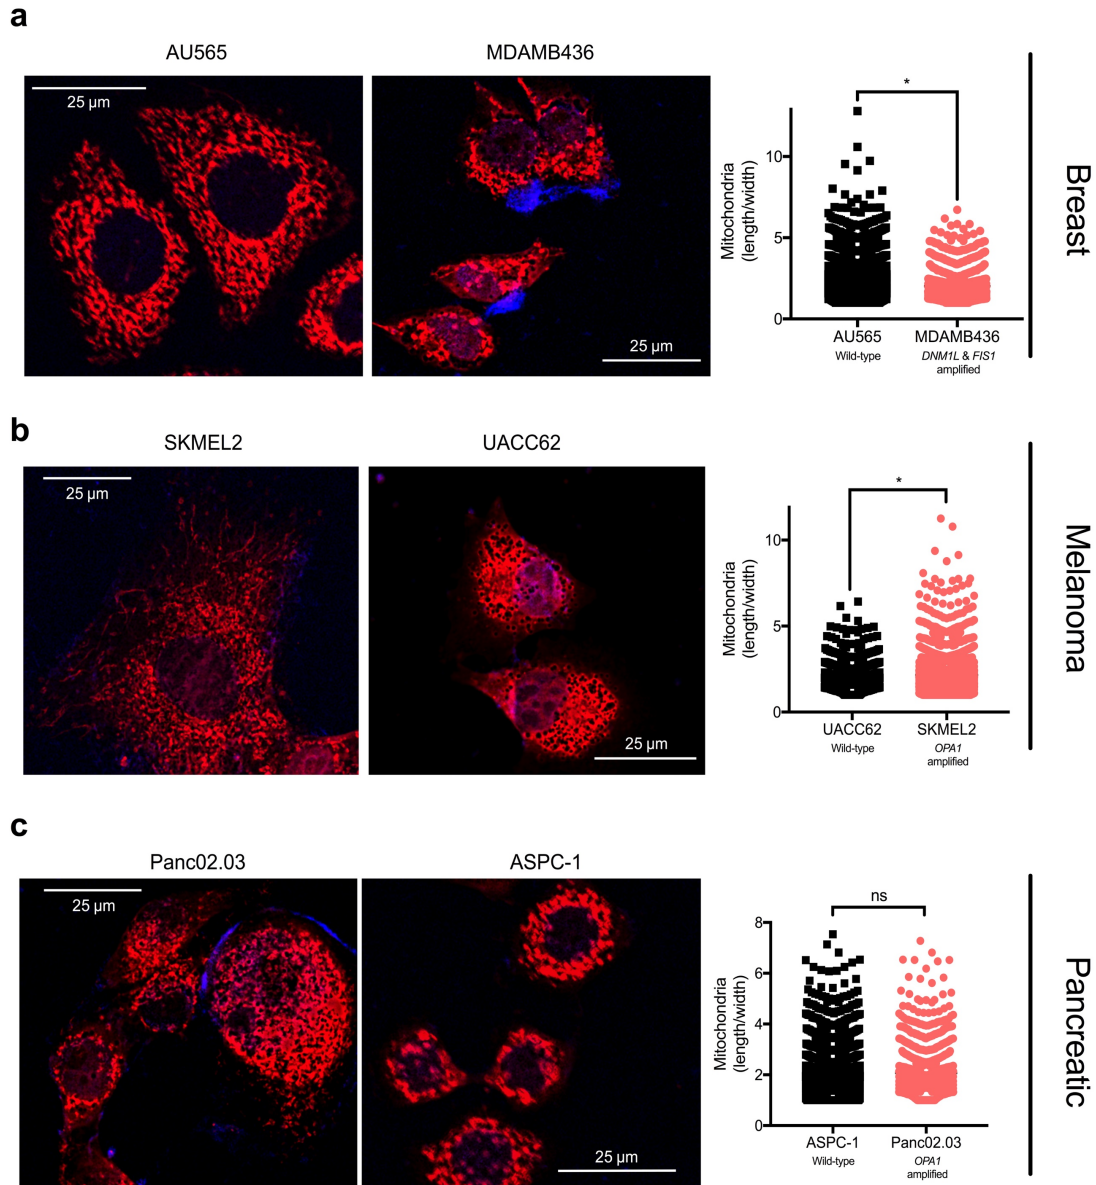

**Supplementary Figure 1: Amplifications in dynamics regulating genes can results in commiserate changes to mitochondrial morphology. a)** Mitotracker and DAPI in two breast cancer cell lines AU565 (wild-type) and MDAMB436 (*DNM1L* and *FIS1* amplifications). Right, mitochondrial length x width quantification is plotted for thousands of mitochondria from >10 cells across at least two independent experiments. \* $p < 0.05$  by student's t-test. **b)** Mitotracker and DAPI in two melanoma cancer cell lines SKMEL2 (*OPA1* amplified) and UACC62 (wild-type). Right, mitochondrial length x width quantification is plotted for thousands of mitochondria from

>10 cells across at least two independent experiments. \*p < 0.05 by student's t-test. **c)** Mitotracker and DAPI in two pancreatic cancer cell lines Panc02.03 (*OPA1* amplified) and ASPC-1 (wild-type). Right, mitochondrial length x width quantification is plotted for thousands of mitochondria from >10 cells across at least two independent experiments. \*p < 0.05 by student's t-test. For a-c, scale bars 25  $\mu$ m and immunofluorescence images are representative of two independent experiments.

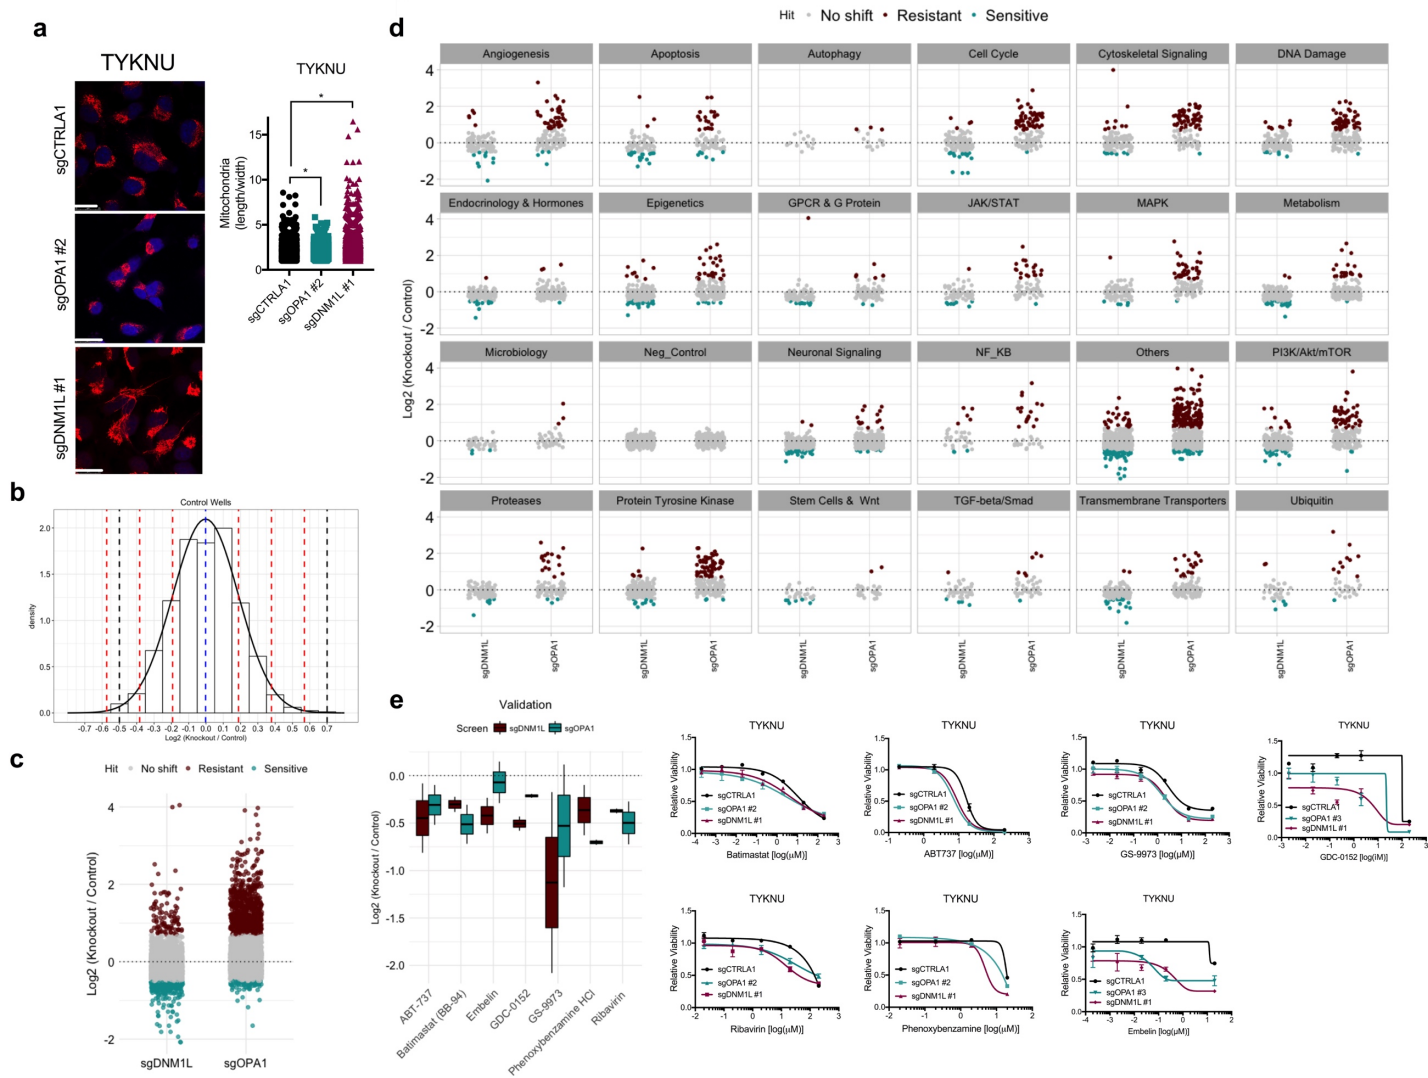

## Supplementary Figure 2: Small-molecule screening results and validation of screening

**hits.** **a)** Mitotracker red and DAPI staining on TYKNU cells transduced with a control sgRNA or

a representative sgRNA targeting either *OPA1* or *DNM1L*. Scale bars 25  $\mu$ m. Immunofluorescence images are representative of two independent experiments. Right,

mitochondrial length x width quantification is plotted for thousands of mitochondria from >10 cells

across at least two independent experiments. \* $p < 0.05$  by one-way anova. **b)** Density plot of the

distribution of the  $\text{Log}_2(\text{knockout}/\text{control})$  viability ratios of the control wells. Blue dotted line

indicates the mean value. Each set of red dotted lines indicates 1 SD away from the mean. The

black dotted line indicates the threshold for hit calling. **c)** The  $\text{Log}_2(\text{knockout}/\text{control})$  ratio in both doses of the small-molecule library. **d)** The  $\text{Log}_2(\text{knockout}/\text{control})$  ratio binned into the pathway annotation for each drug. **e)** Left,  $\text{Log}_2(\text{knockout}/\text{control})$  ratio for seven drugs that were called as hits in the small-molecule screen. Right, secondary validation  $\text{GI}_{50}$  curves for each of the drugs from the left panel in TYKNU cells transduced with a control sgRNA and a representative sgRNA targeting either *DNM1L* or *OPA1* (n=3).

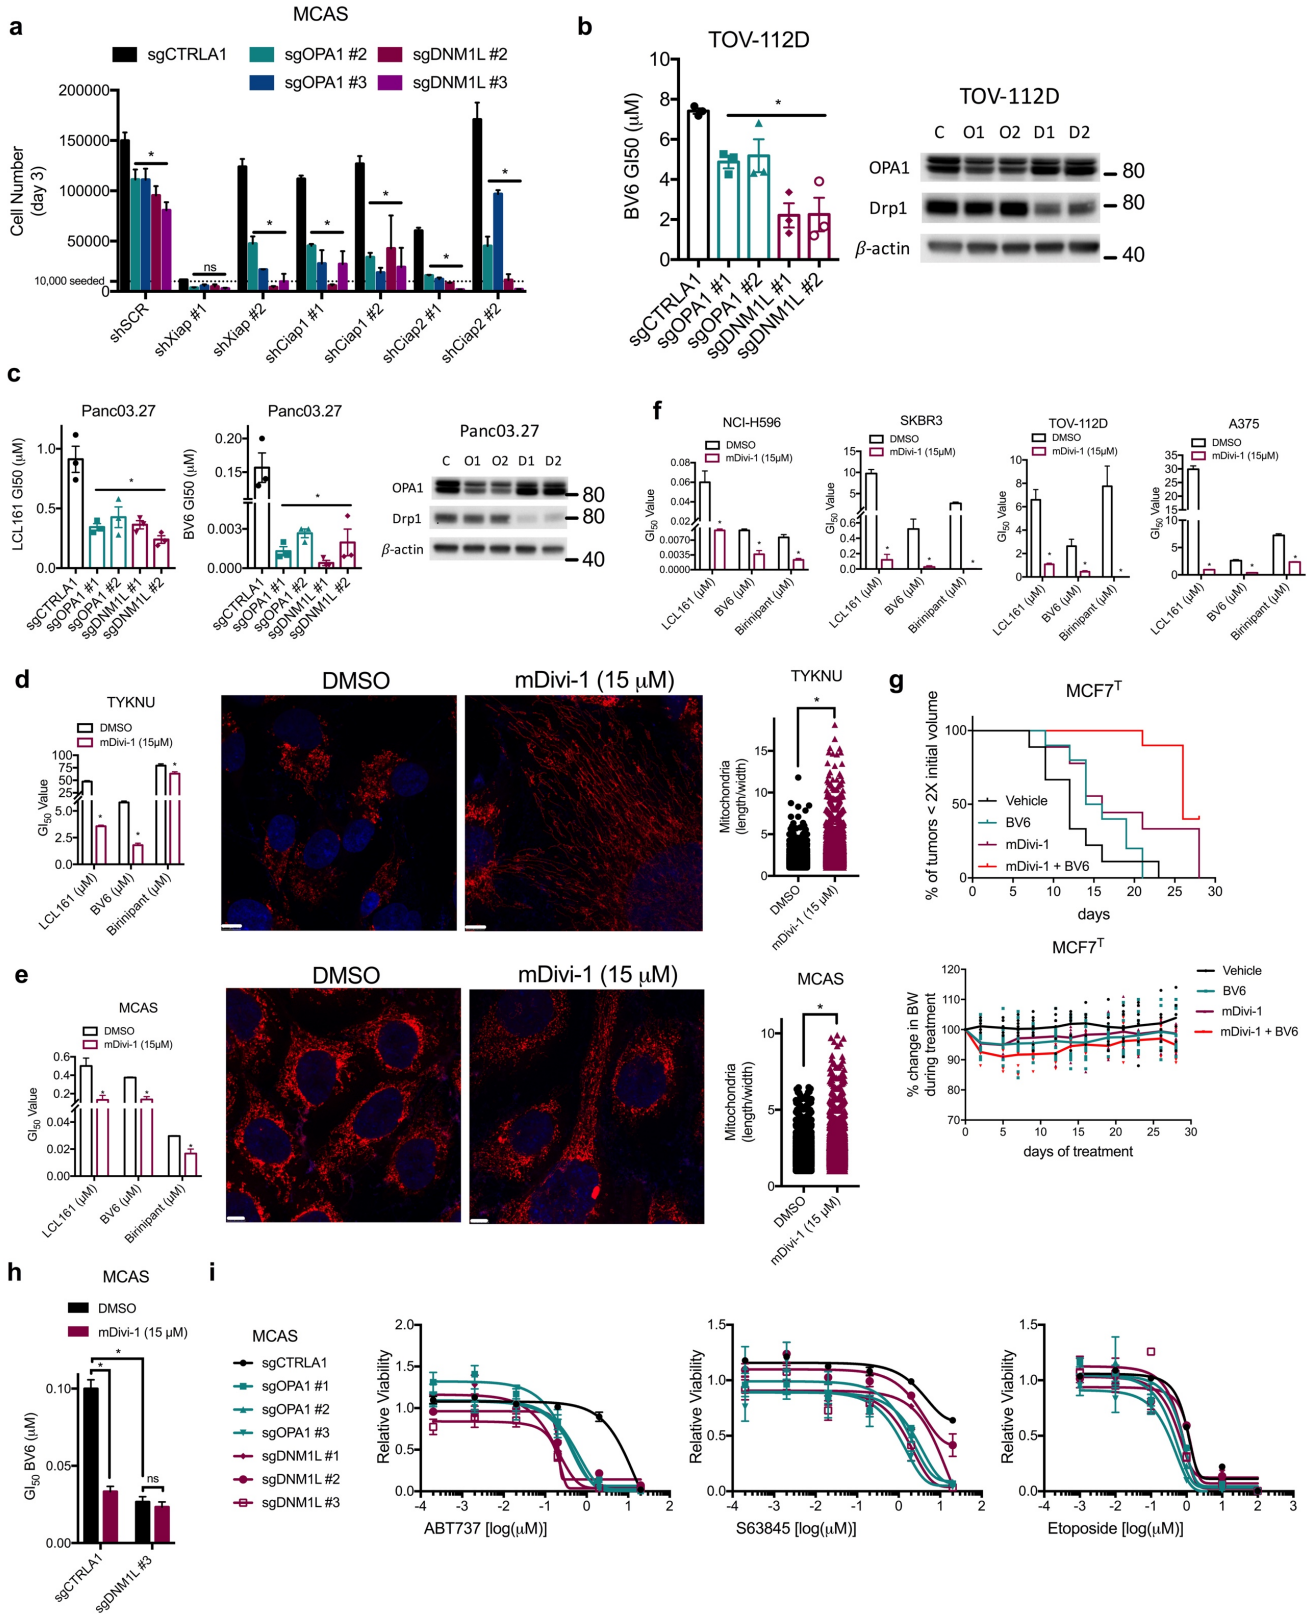

**Supplementary Figure 3: Genetic and pharmacological validation of increased potency of**

**SMAC mimetics across cancer tissue types. a)** 2D growth assay plotted as cell number in MCAS cells transduced with one of the following: a control targeting sgRNA, one of two *OPA1* targeting sgRNAs, or one of two *DNM1L* targeting sgRNAs—and one of the following: a scramble shRNA, or one of two XIAP targeting shRNAs, or one of two CIAP1 targeting shRNAs, or one of two CIAP2 targeting shRNAs. (n=3) Data are mean  $\pm$  SEM. \*p < 0.05 by one-way ANOVA. **b)** Left, GI<sub>50</sub> values for BV6 in TOV-112D cells transduced with a control targeting sgRNA, or two independent sgRNAs targeting either *OPA1* or *DNM1L* (n=3). Data are mean  $\pm$  SEM. \*p < 0.05 by one-way ANOVA. Right, immunoblot of *OPA1* or *DNM1L* in cells from the middle. **c)** Left, GI<sub>50</sub> values for LCL161 and BV6 in Panc03.27 cells transduced with a control targeting sgRNA or two independent sgRNAs targeting either *OPA1* or *DNM1L* (n=3). Data are mean  $\pm$  SEM. \*p < 0.05 by one-way ANOVA. Right, immunoblot of *OPA1* or *DNM1L* in cells from the left. **d)** Left, GI<sub>50</sub> values for three SMAC mimetics (LCL161, BV6, Birinipant) in TYKNU cells treated with either vehicle or mDivi-1 (15  $\mu$ M). Data are mean  $\pm$  SEM. \* p < 0.05 by one-way ANOVA. Right, mitotracker red and DAPI staining in TYKNU cells treated with vehicle or mDivi-1 (15  $\mu$ M). Scale bars 7.5  $\mu$ m. Immunofluorescence images are representative of two independent experiments. **e)** Left, GI<sub>50</sub> values for three SMAC mimetics (LCL161, BV6, Birinipant) in MCAS cells treated with either vehicle or mDivi-1 (15  $\mu$ M). Data are mean  $\pm$  SEM. \* p < 0.05 by one-way ANOVA. (n=3). Right, mitotracker red and DAPI staining in MCAS cells treated with vehicle or mDivi-1 (15  $\mu$ M) (scale bars 7.5  $\mu$ m). Immunofluorescence images are representative of two independent experiments. **f)** GI<sub>50</sub> values for three SMAC mimetics (LCL161, BV6, Birinipant) in NCIH596, SKBR3, TOV-112D, or A375 cells treated with either vehicle or mDivi-1 (15  $\mu$ M) (n=3). Data are mean  $\pm$  SEM. \* p < 0.05 by one-way ANOVA. **g)** Top, survival plot of *in vivo* data from Figure 3e as the number of mice with tumors less than 2X the original size (see methods for n in each

group and statistics). Right, weights of the mice from *in vivo* data in Figure 3e (see methods for n in each group and statistics). Immunoblots are cropped for clarity. **h)** GI<sub>50</sub> values to BV6 in MCAS cells transduced with either a control targeting sgRNA or a *DNM1L* targeting sgRNA and treated with either vehicle or mDivi-1 (15 μM) (n=3). Data are mean ± SEM. \* p < 0.05 by one-way ANOVA. **i)** GI<sub>50</sub> curves for MCAS cells transduced with either a control targeting sgRNA or three independent sgRNAs targeting *DNM1L* or *OPA1* for three drugs (ABT737, S63845, Etoposide) (n=3). Data are mean ± SEM.



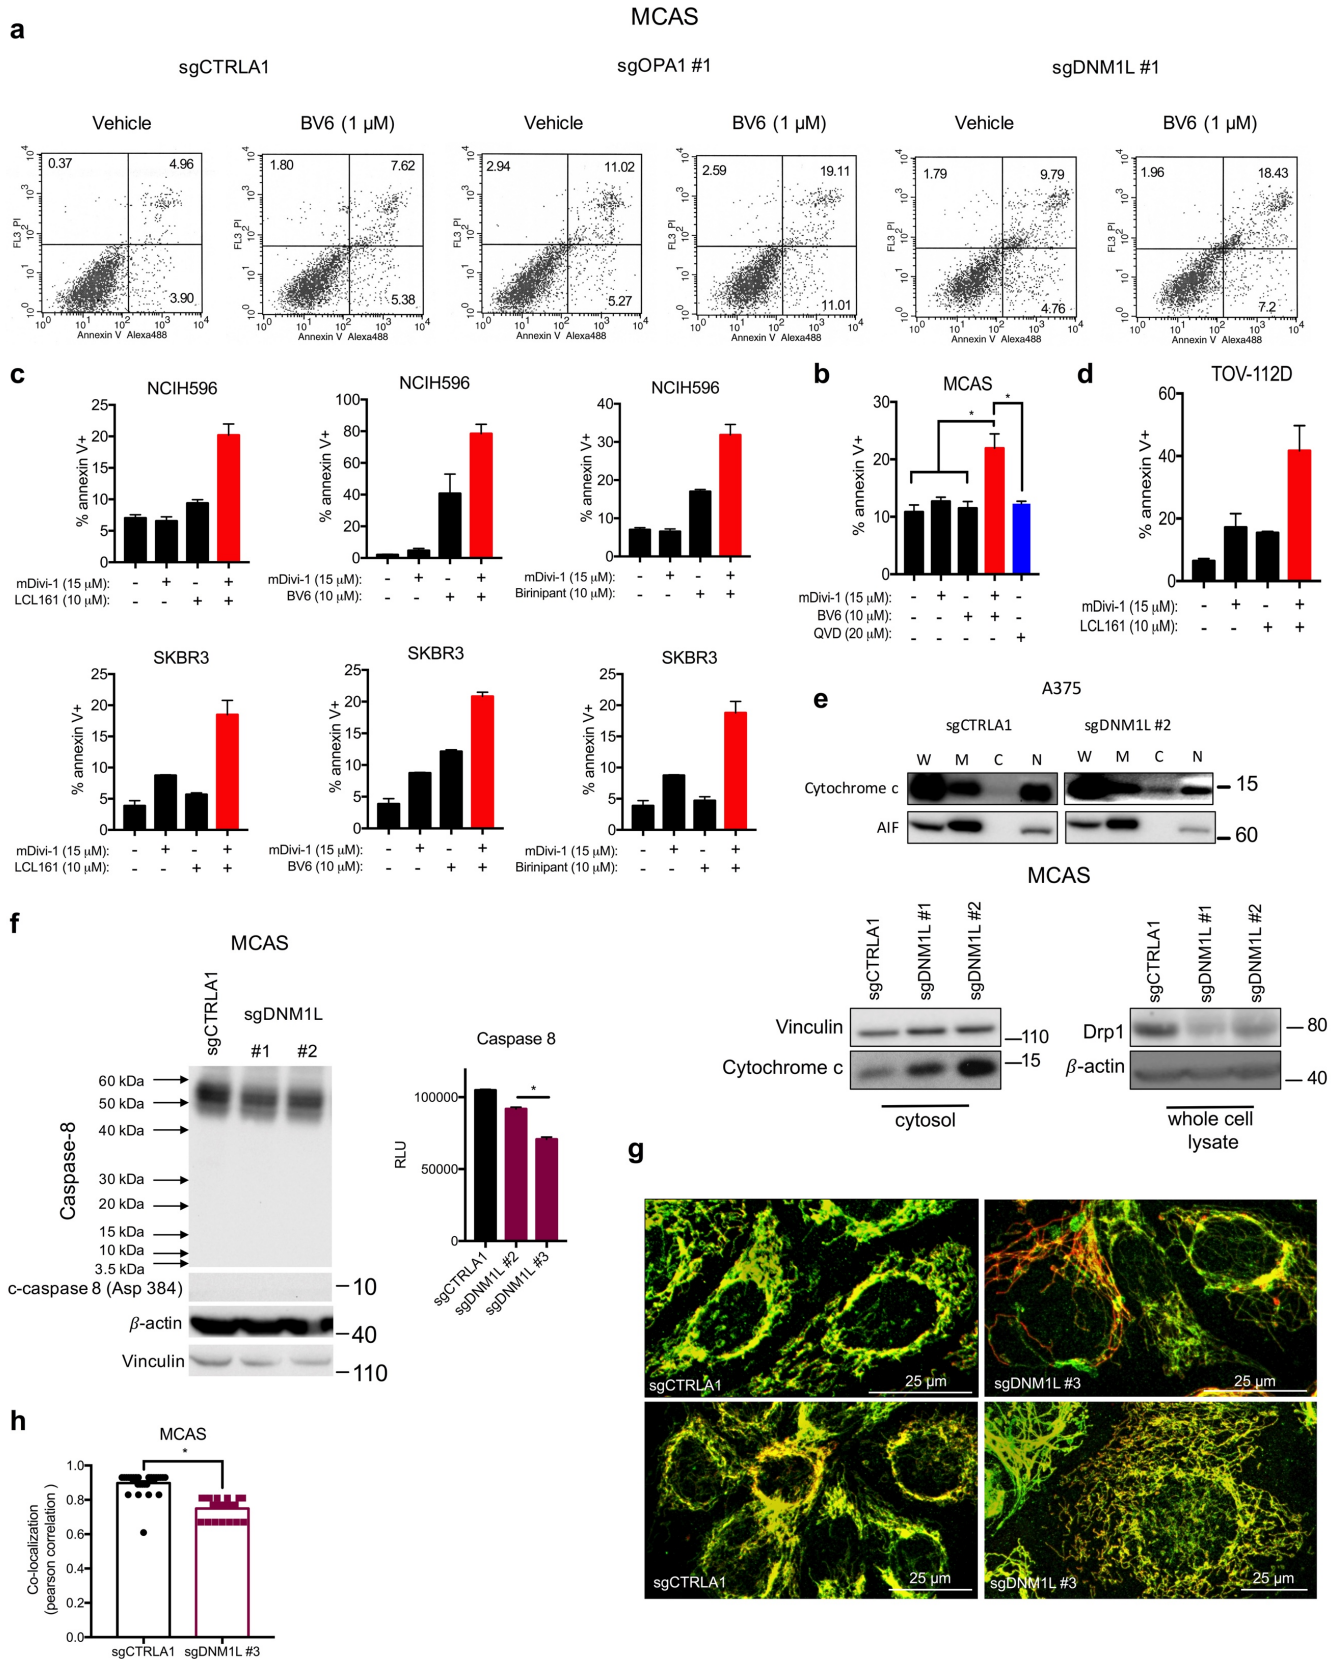

**Supplementary Figure 4: Mechanism of sensitivity to SMAC mimetics in *DNM1L* loss**

**cells. a)** Annexin V and PI staining for MCAS cells transduced with either a control targeting sgRNA, a *DNM1L* targeting sgRNA, or an *OPA1* targeting sgRNA treated with vehicle or BV6 (1  $\mu$ M). **b)** Percentage of annexin V<sup>+</sup> cells following treatment with vehicle, mDivi-1, BV6, the combination, or the combination plus Q-VD-OPh (a pan caspase inhibitor) (n=3). Data are mean  $\pm$  SEM. \*p < 0.05 by one-way ANOVA. **c)** Top, percentage of annexin V<sup>+</sup> cells following treatment with vehicle, mDivi-1, SMAC mimetic (BV6, LCL161, or Birinipant), or the combination in NCIH596 cells (n=3). Data are mean  $\pm$  SEM. \*p < 0.05 by one-way ANOVA. Bottom, percentage of annexin V<sup>+</sup> cells following treatment with vehicle, mDivi-1, SMAC mimetic (BV6, LCL161, or Birinipant), or the combination in SKBR3 cells (n=3). Data are mean  $\pm$  SEM. \*p < 0.05 by one-way ANOVA. **d)** Percentage of annexin V<sup>+</sup> cells following treatment with vehicle, mDivi-1, LCL161, or the combination in TOV-112D cells (n=3). Data are mean  $\pm$  SEM. \*p < 0.05 by one-way ANOVA. **e)** Top, immunoblot of cytochrome c or AIF in whole cell lysate, membrane fraction, cytosolic fraction, and nuclear fraction of A375 cells transduced with a control sgRNA or a representative sgRNA targeting *DNM1L*. Bottom, immunoblot of vinculin and cytochrome c (cytosolic fraction), and Drp1 and  $\beta$ -actin (whole cell lysate), in MCAS cells transduced with control sgRNA or two independent sgRNAs for *DNM1L*. Immunoblots are representative of two independent experiments. AIF is used as a control for contamination of the cytosolic fraction. **f)** Left, immunoblot of vinculin,  $\beta$ -actin, T-caspase 8, and c-caspase 8 in MCAS cells transduced with a control sgRNA or two independent sgRNAs for *DNM1L*. Immunoblots are representative of two independent experiments. Right, raw luminescence units of caspase 8 activity in MCAS cells transduced with control sgRNA or two independent sgRNAs for *DNM1L* (n=3). Data are mean  $\pm$  SEM. \*p < 0.05 by one-way ANOVA. **g)** Tom20 (red) and cytochrome c (green) immunofluorescence in MCAS cells transduced with a control sgRNA or *DNM1L* targeting

sgRNA. Scale bar is 25  $\mu\text{m}$ . Immunofluorescence images are representative of two independent experiments. **h)** Co-localization (Pearson correlation) quantification of two different image channels in at least 25 cells across at least two independent experiments. Higher correlation values indicate a greater extent of co-localization. \* $p < 0.05$  by student's t-test.

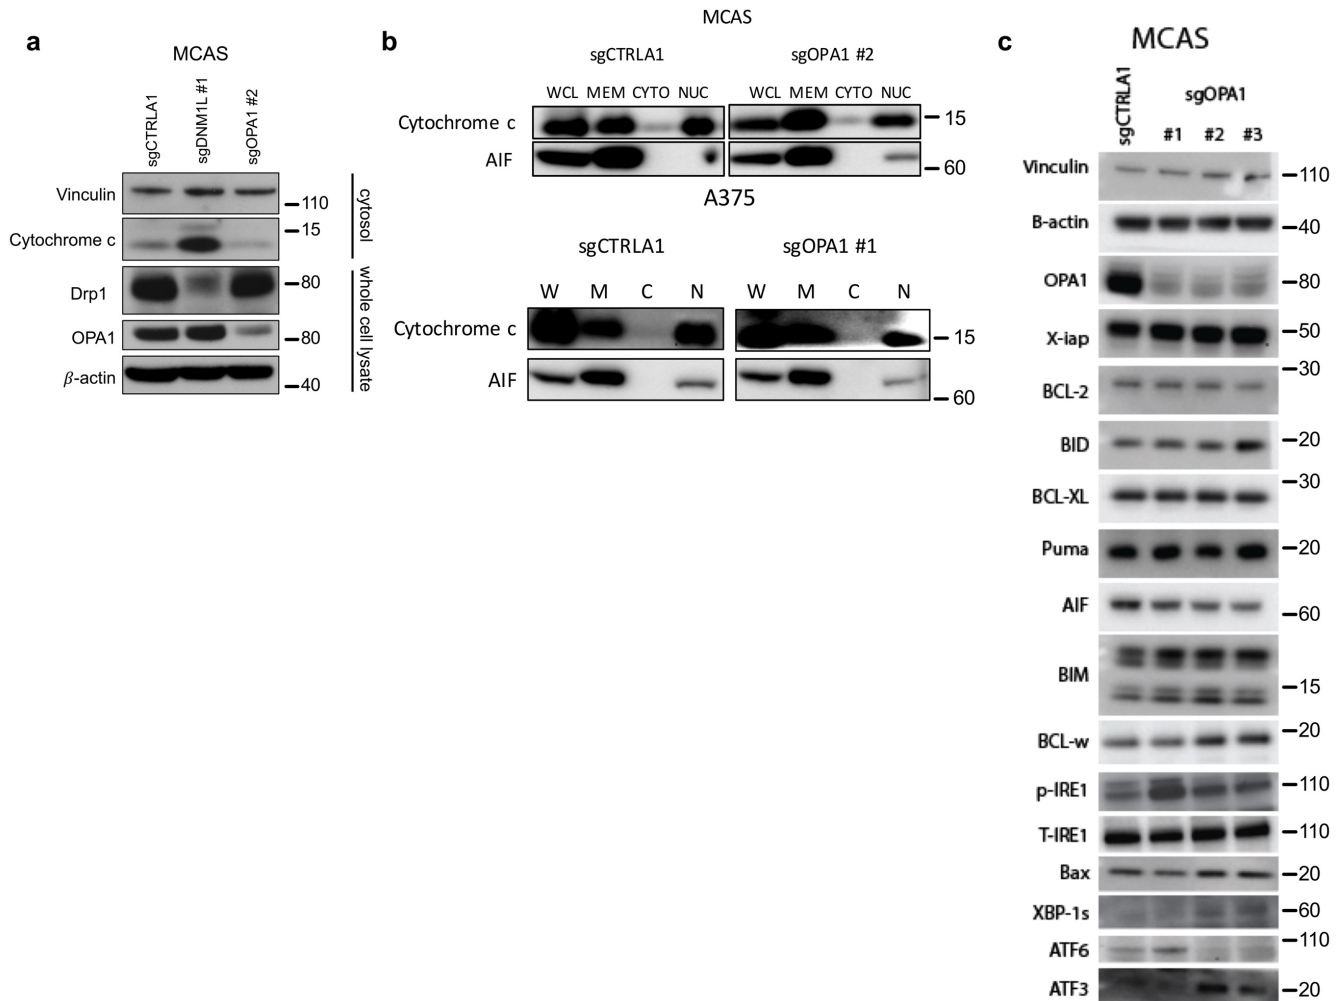

**Supplementary Figure 5: Mechanism of sensitivity to SMAC mimetics in *OPA1* loss cells.**

**a)** Immunoblot of indicated proteins in cytosolic fraction or whole cell lysate of MCAS cells transduced with a control sgRNA and representative sgRNAs for *DNM1L* and *OPA1*. Immunoblots are representative of two independent experiments. **b)** Top, Immunoblot of cytochrome c or AIF in whole cell lysate, membrane fraction, cytosolic fraction, and nuclear fraction of MCAS cells transduced with a control sgRNA or a representative sgRNA targeting *OPA1*. Bottom, same as above panel but in A375 cells. Immunoblots are representative of two independent experiments. AIF is used as a control for fractionation, as it should be present only in the membrane fraction. **c)** Immunoblot of indicated proteins in MCAS cells transduced with a

control sgRNA and three sgRNAs targeting *OPA1*. Immunoblots are cropped for clarity. Immunoblots are representative of two independent experiments.

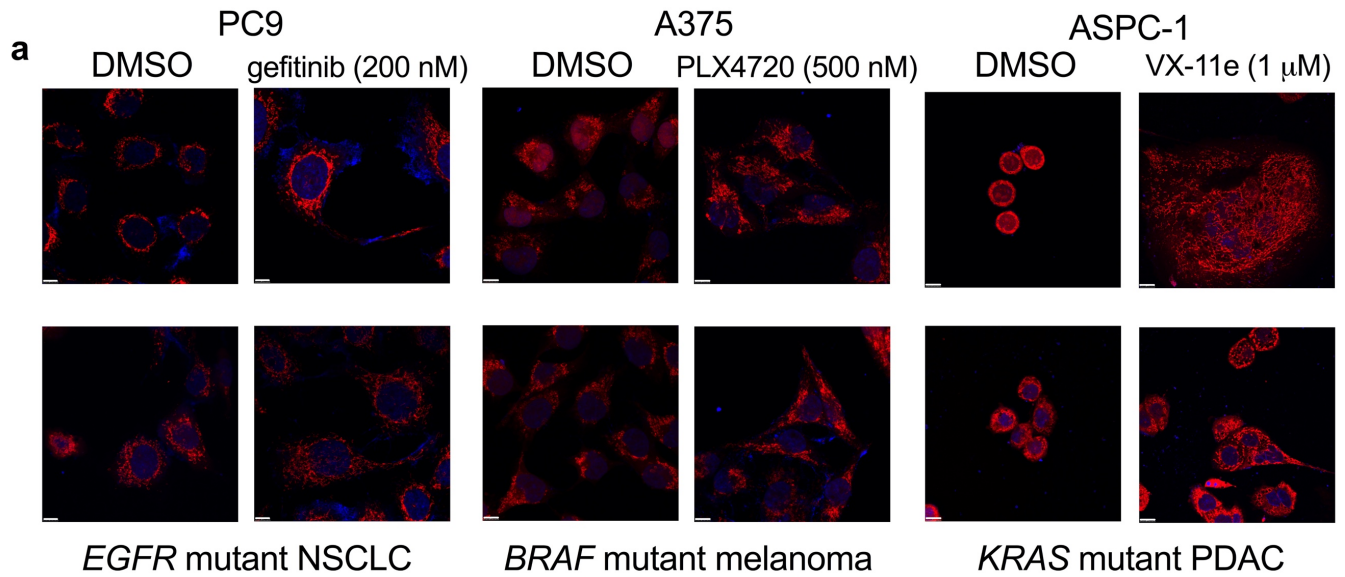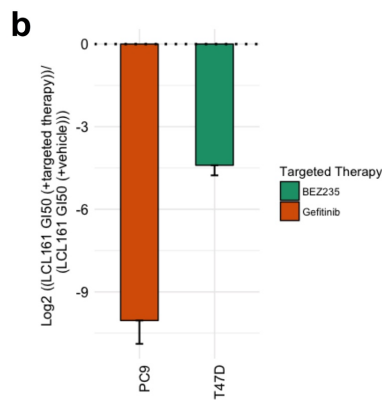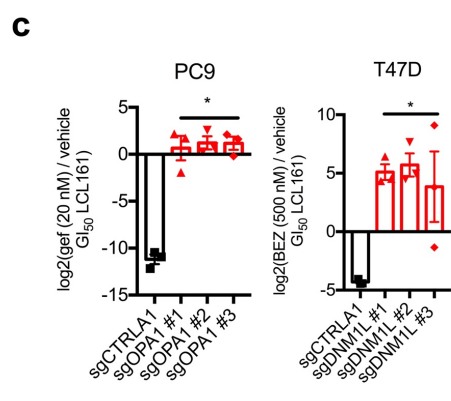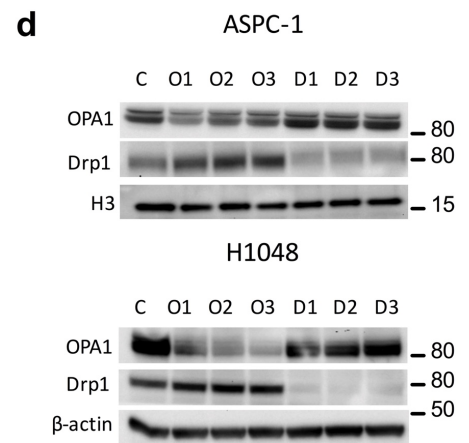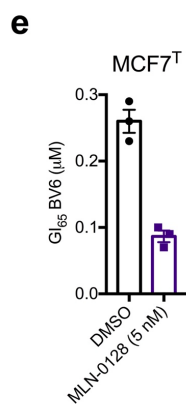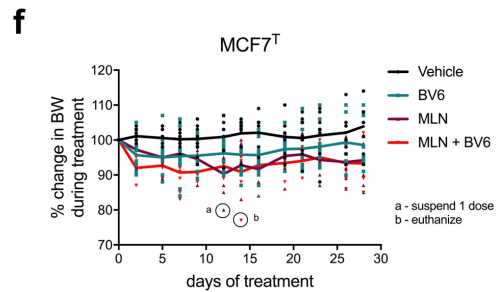

**Supplementary Figure 6: Oncogenic control of mitochondrial dynamics and sensitivity to SMAC mimetics. a)** Mitotracker and DAPI in three cell lines: PC9 (scale bars 7.5 μm), A375

(scale bars 7.5  $\mu\text{m}$ ), ASPC-1 (scale bars 10  $\mu\text{m}$ ) treated with vehicle or one of three inhibitors (gefitinib, PLX4720, VX-11e). Immunofluorescence images are representative of two independent experiments. **b)**  $\text{Log}_2((\text{LCL161 GI50 (+targeted therapy)})/(\text{LCL161 GI50 (+vehicle)}))$  in two cell lines driven by different oncogenes (n=3). Data are mean  $\pm$  SEM. **c)**  $\text{Log}_2((\text{LCL161 GI50 (+targeted therapy)})/(\text{LCL161 GI50 (+vehicle)}))$  in two cell lines driven by different oncogenes transduced with a control sgRNA, three sgRNAs targeting *DNM1L*, or three sgRNAs targeting *OPA1* (n=3). Data are mean  $\pm$  SEM. \*p < 0.05 by one-way ANOVA. **d)** Top, Immunoblot of OPA1 and Drp1 in ASPC-1 cells transduced with a control sgRNA or three sgRNAs targeting either *DNM1L* or *OPA1*. Bottom, same as above but in H1048 cells. Immunoblots are representative of two independent experiments. **e)**  $\text{GI}_{65}$  to BV6 in MCF7<sup>T</sup> cells treated with either vehicle or MLN-0128 (5 nM) (n=3). Data are mean  $\pm$  SEM. \*p < 0.05 by student's t-test. **f)** Weights of the mice from *in vivo* data in Figure 6d (see methods for n in each group and statistics).

**Figure 2a**

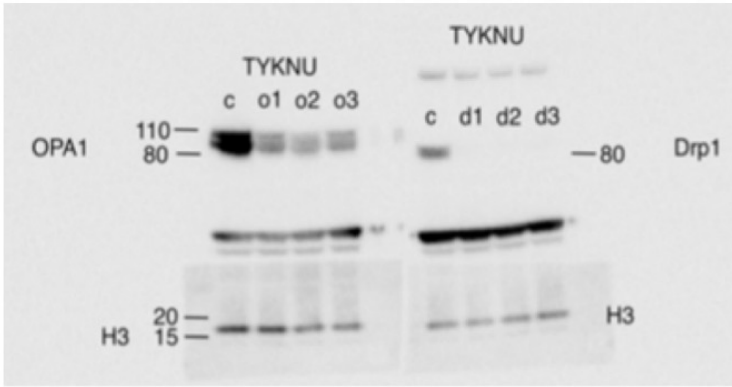

**Figure 3c**

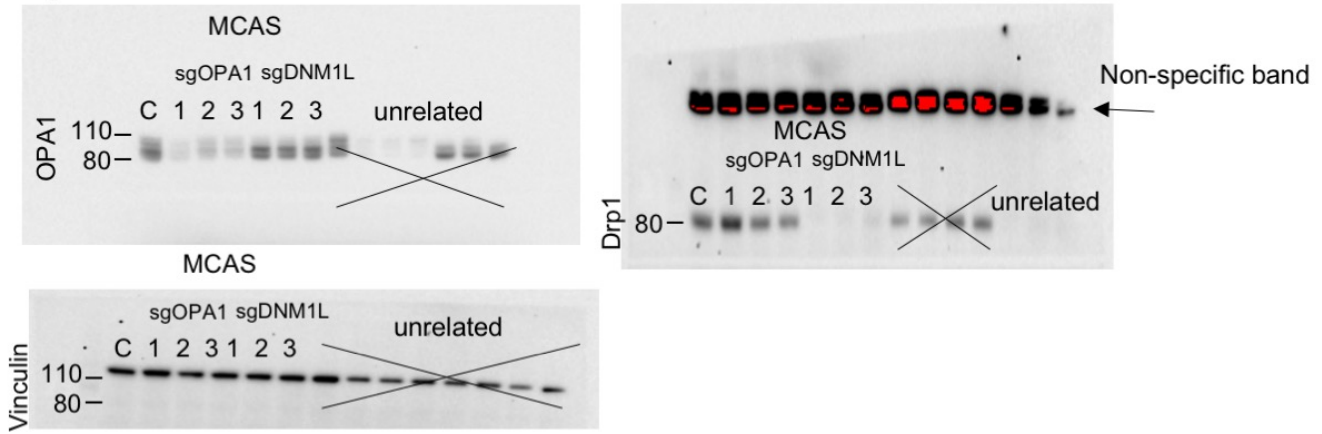

**Figure 3d,e**

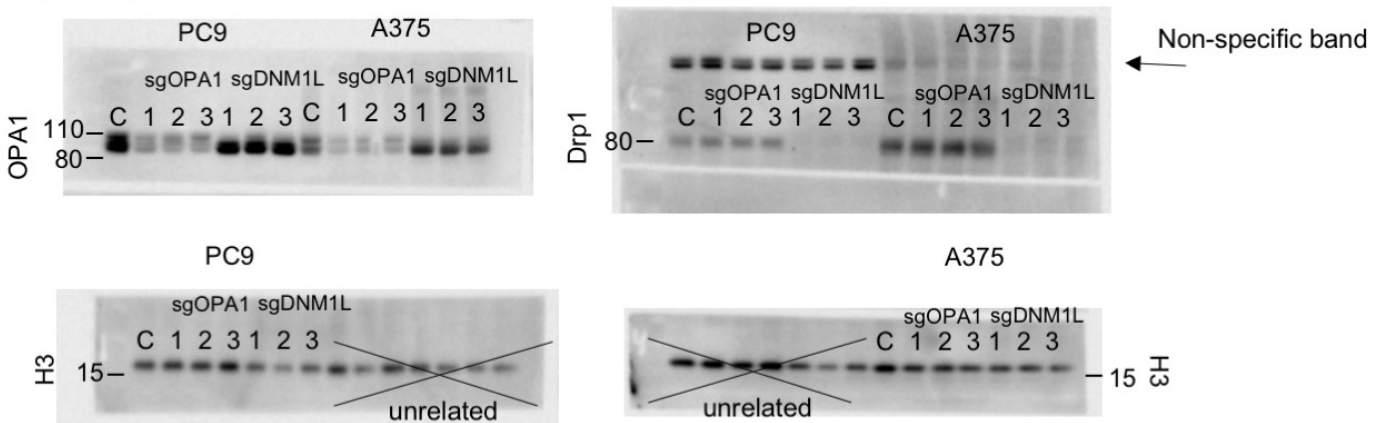

**Supplementary Figure 7: Uncropped westerns for various figures.**



Figure 3f

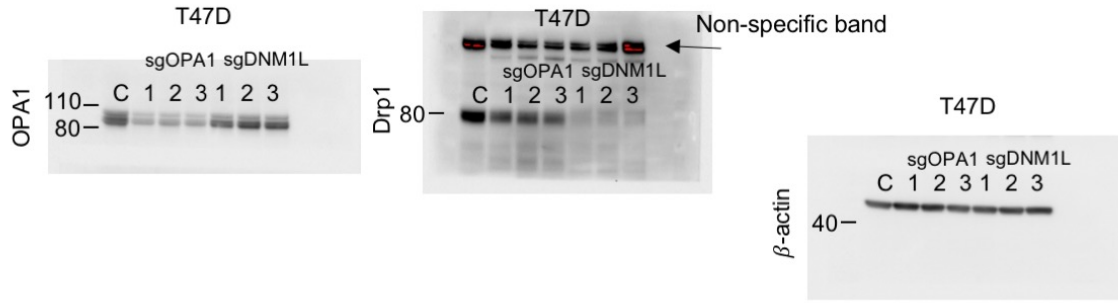

Figure 4b

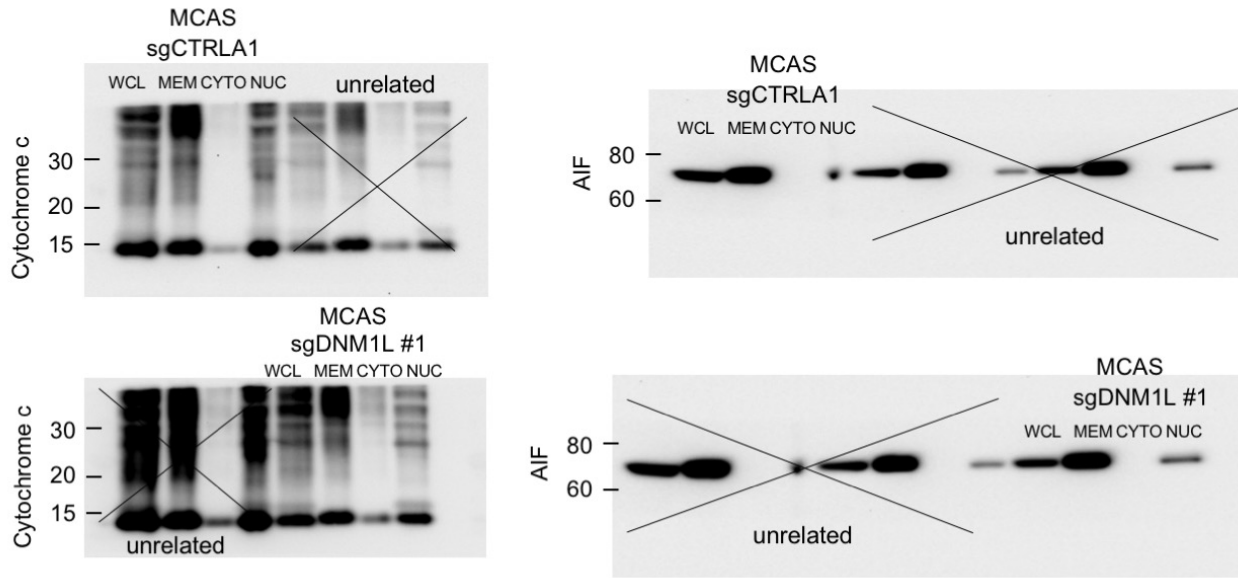

Figure 4c

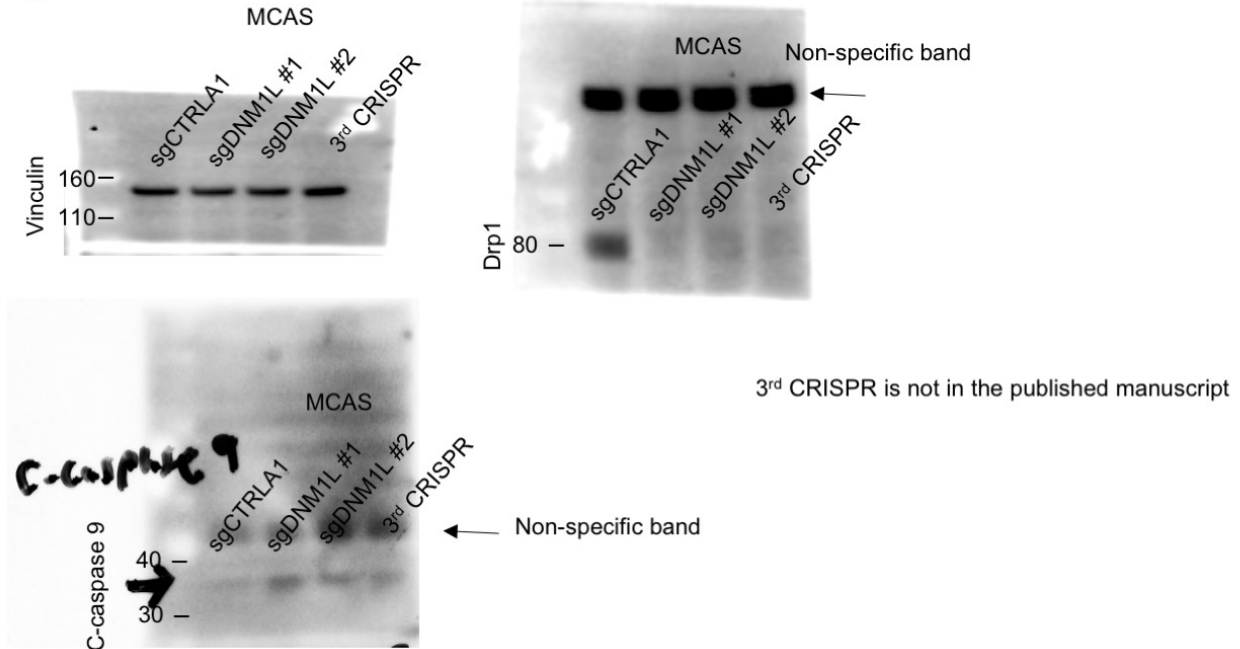

Supplementary Figure 7: Uncropped westerns for various figures.

Figure 5d

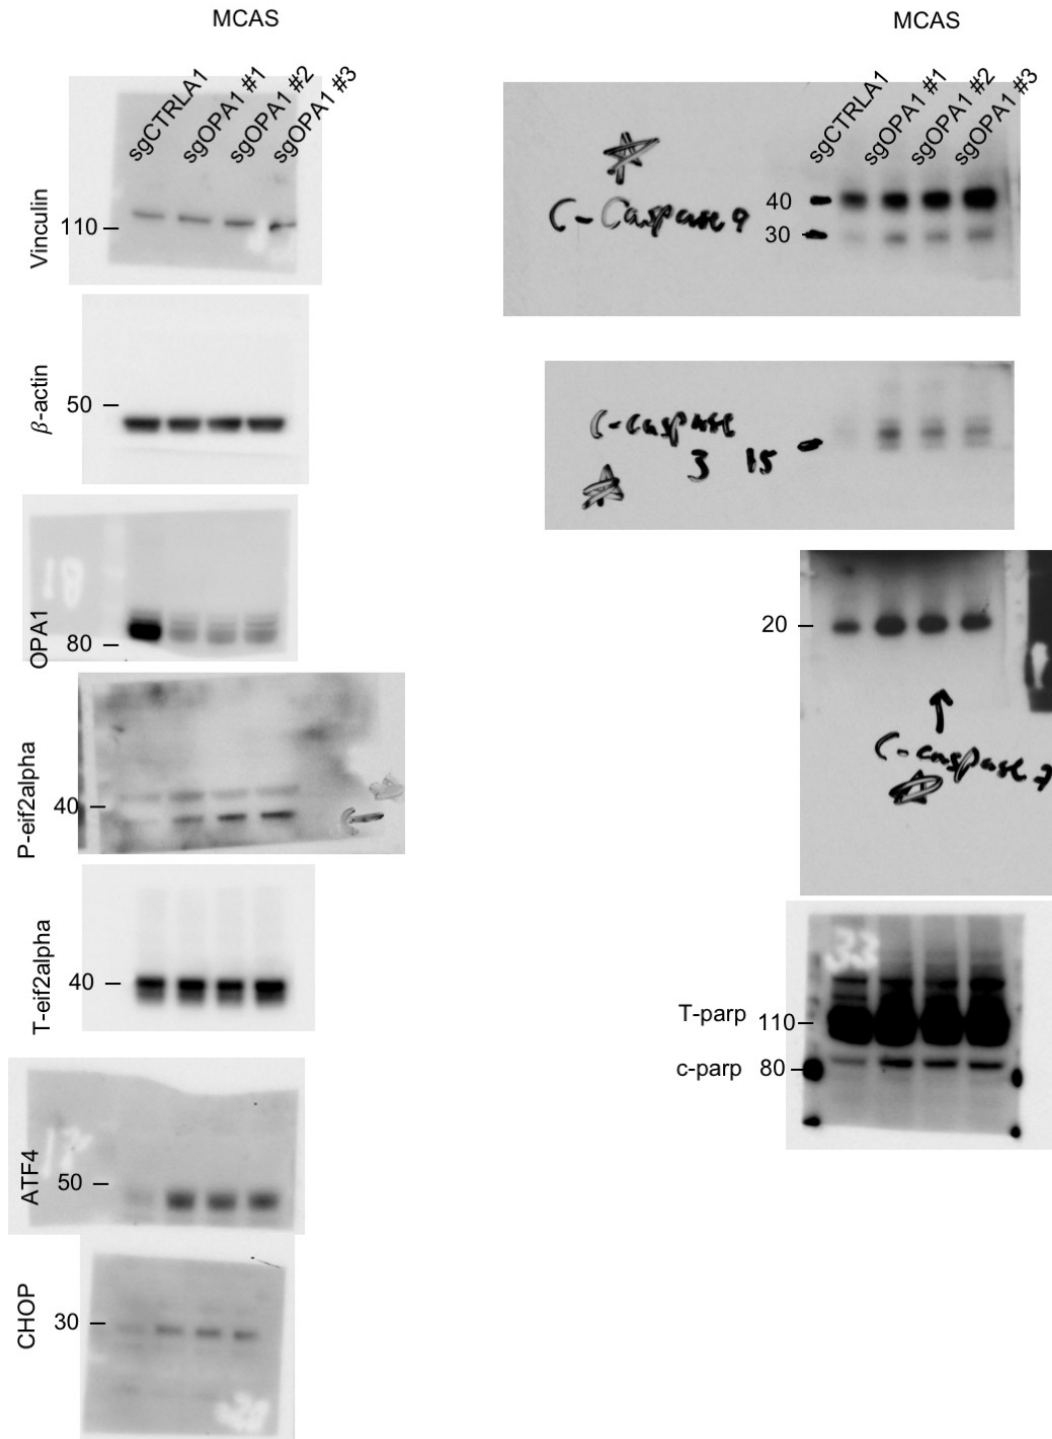

Supplementary Figure 7: Uncropped westerns for various figures.

Figure 5h

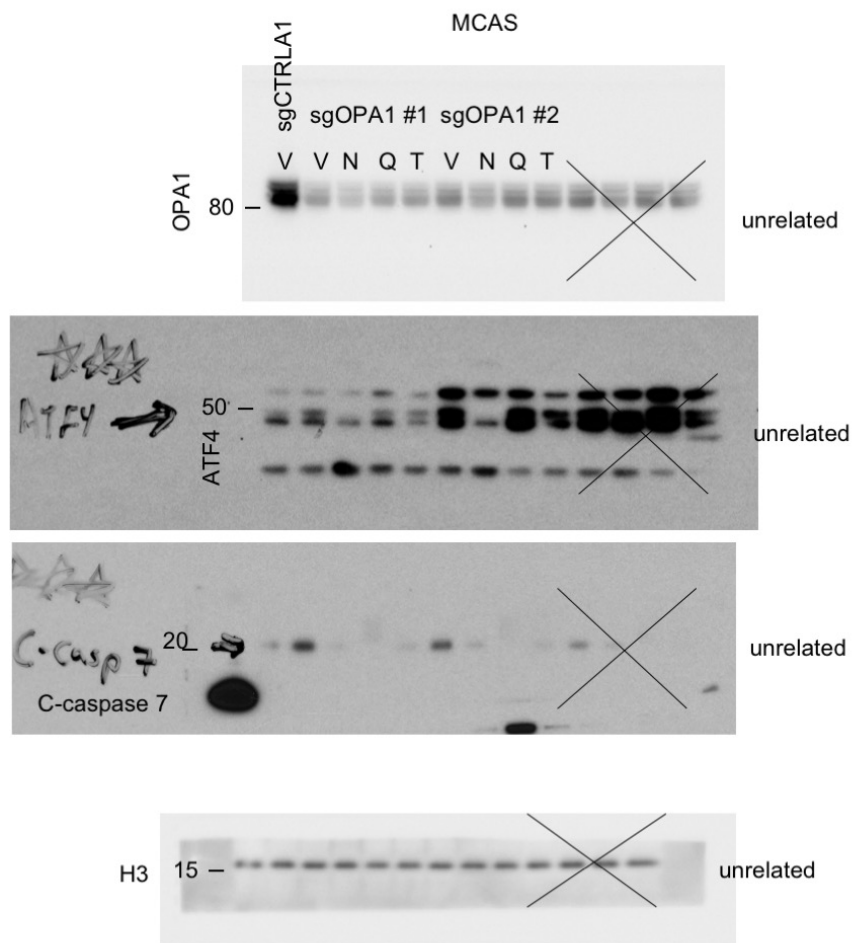

Supplementary Figure 7: Uncropped westerns for various figures.
