# Supplementary material for: Dysregulation of mitochondrial dynamics proteins are a targetable feature of human tumors
Source: PubMed Central journal article supplement (PMC5919970; doi:10.1038/s41467-018-04033-x), 2018-04-26
Supplement: 41467_2018_4033_MOESM3_ESM.pdf [file 41467_2018_4033_MOESM3_ESM.pdf]

## **Description of Additional Supplementary Files**

### **File Name: Supplementary Data 1**

**Description:** Computational identification of drugs with differential potencies in cell lines with alterations in mitochondrial dynamics-regulating genes.

### **File Name: Supplementary Data 2**

**Description:** Screening data for DNM1L and OPA1 knockout derivatives.
